# Supplementary material for: Identification of mutations in SARS-CoV-2 PCR primer regions
Source: Research Square preprint supplement (doi:10.21203/rs.3.rs-1838361/v1), 2022-07-22
Supplement: Supplementary file 1 [file 479342fe9b23acb235357ccb.xlsx]

## Sheet: Munka1
target_gene	origin	country	type	primer_name	primer_set	original_primer_name	target_sequence	target_sequence_start_pos	target_sequence_end_pos	primer_size_bp	reference_genome	update_time	doi	reference	other_reference
N	HKU	Hong Kong	F	Chan-N	Chan-set	COVID-19-N	GCGTTCTTCGGAATGTCG	29210	29227	18	NC_045512.2	2020-03-04	10.1128/JCM.00310-20	Chan et al 2020	-
N	HKU	Hong Kong	R	Chan-N	Chan-set	COVID-19-N	TTGGATCTTTGTCATCCAATTTG	29284	29306	23	NC_045512.2	2020-03-04	10.1128/JCM.00310-20	Chan et al 2020	-
RdRp	HKU	Hong Kong	F	Chan-RdRp	Chan-set	COVID-19-RdRp/Hel	CGCATACAGTCTTRCAGGCT	16220	16239	20	NC_045512.2	2020-03-04	10.1128/JCM.00310-20	Chan et al 2020	-
RdRp	HKU	Hong Kong	R	Chan-RdRp	Chan-set	COVID-19-RdRp/Hel	GTGTGATGTTGAWATGACATGGTC	16330	16353	24	NC_045512.2	2020-03-04	10.1128/JCM.00310-20	Chan et al 2020	-
S	HKU	Hong Kong	F	Chan-S	Chan-set	COVID-19-S	CCTACTAAATTAAATGATCTCTGCTTTACT	22712	22741	30	NC_045512.2	2020-03-04	10.1128/JCM.00310-20	Chan et al 2020	-
S	HKU	Hong Kong	R	Chan-S	Chan-set	COVID-19-S	CAAGCTATAACGCAGCCTGTA	22849	22869	21	NC_045512.2	2020-03-04	10.1128/JCM.00310-20	Chan et al 2020	-
N	HKU	Hong Kong	probe	Chan-N	Chan-set	COVID-19-N	AACGTGGTTGACCTACACAGST	29257	29278	22	NC_045512.2	2020-03-04	10.1128/JCM.00310-20	Chan et al 2020	-
RdRp	HKU	Hong Kong	probe	Chan-RdRp	Chan-set	COVID-19-RdRp/Hel	TTAAGATGTGGTGCTTGCATACGTAGAC	16276	16303	28	NC_045512.2	2020-03-04	10.1128/JCM.00310-20	Chan et al 2020	-
S	HKU	Hong Kong	probe	Chan-S	Chan-set	COVID-19-S	CGCTCCAGGGCAAACTGGAAAG	22792	22813	22	NC_045512.2	2020-03-04	10.1128/JCM.00310-20	Chan et al 2020	-
N	HKU	Hong Kong	F	Chu-N	Chu-set	HKU-N	TAATCAGACAAGGAACTGATTA	29145	29166	22	NC_045512.2	2020-04-01	10.1093/clinchem/hvaa029	Chu et al 2020	https://bit.ly/2ZxOnsw
N	HKU	Hong Kong	R	Chu-N	Chu-set	HKU-N	CGAAGGTGTGACTTCCATG	29236	29254	19	NC_045512.2	2020-04-01	10.1093/clinchem/hvaa029	Chu et al 2020	https://bit.ly/2ZxOnsw
ORF1ab	HKU	Hong Kong	F	Chu-ORF1ab	Chu-set	HKU-ORF1ab	TGGGGYTTTACRGGTAACCT	18778	18797	20	NC_045512.2	2020-04-01	10.1093/clinchem/hvaa029	Chu et al 2020	https://bit.ly/2ZxOnsw
ORF1ab	HKU	Hong Kong	R	Chu-ORF1ab	Chu-set	HKU-ORF1ab	AACRCGCTTAACAAAGCACTC	18889	18909	21	NC_045512.2	2020-04-01	10.1093/clinchem/hvaa029	Chu et al 2020	https://bit.ly/2ZxOnsw
ORF1ab	HKU	Hong Kong	probe	Chu-ORF1ab	Chu-set	HKU-ORF1ab	TAGTTGTGATGCWATCATGACTAG	18849	18872	24	NC_045512.2	2020-04-01	10.1093/clinchem/hvaa029	Chu et al 2020	https://bit.ly/2ZxOnsw
N	HKU	Hong Kong	probe	Chu-N	Chu-set	HKU-N	GCAAATTGTGCAATTTGCGG	29177	29196	20	NC_045512.2	2020-04-01	10.1093/clinchem/hvaa029	Chu et al 2020	https://bit.ly/2ZxOnsw
E	Charité	Germany	F	Corman-E	Corman-set	E_Sarbeco_F	ACAGGTACGTTAATAGTTAATAGCGT	26269	26294	26	NC_045512.2	2020-01-23	10.2807/1560-7917.ES.2020.25.3.2000045	Corman et al 2020	https://bit.ly/2ZxOnsw
E	Charité	Germany	R	Corman-E	Corman-set	E_Sarbeco_R	ATATTGCAGCAGTACGCACACA	26360	26381	22	NC_045512.2	2020-01-23	10.2807/1560-7917.ES.2020.25.3.2000045	Corman et al 2020	https://bit.ly/2ZxOnsw
N	Charité	Germany	F	Corman-N	Corman-set	N_Sarbeco_F	CACATTGGCACCCGCAATC	28706	28724	19	NC_045512.2	2020-01-23	10.2807/1560-7917.ES.2020.25.3.2000045	Corman et al 2020	-
N	Charité	Germany	R	Corman-N	Corman-set	N_Sarbeco_R	GAGGAACGAGAAGAGGCTTG	28814	28833	20	NC_045512.2	2020-01-23	10.2807/1560-7917.ES.2020.25.3.2000045	Corman et al 2020	-
RdRp	Charité	Germany	F	Corman-RdRp	Corman-set	RdRp_SARSr-F	GTGARATGGTCATGTGTGGCGG	15431	15452	22	NC_045512.2	2020-01-23	10.2807/1560-7917.ES.2020.25.3.2000045	Corman et al 2020	-
RdRp	Charité	Germany	R	Corman-RdRp	Corman-set	RdRp_SARSr-R	CARATGTTAAASACACTATTAGCATA	15505	15530	26	NC_045512.2	2020-01-23	10.2807/1560-7917.ES.2020.25.3.2000045	Corman et al 2020	-
E	Charité	Germany	probe	Corman-E	Corman-set	E_Sarbeco_P1	ACACTAGCCATCCTTACTGCGCTTCG	26332	26357	26	NC_045512.2	2020-01-23	10.2807/1560-7917.ES.2020.25.3.2000045	Corman et al 2020	https://bit.ly/2ZxOnsw
N	Charité	Germany	probe	Corman-N	Corman-set	N_Sarbeco_P	ACTTCCTCAAGGAACAACATTGCCA	28753	28777	25	NC_045512.2	2020-01-23	10.2807/1560-7917.ES.2020.25.3.2000045	Corman et al 2020	-
RdRp	Charité	Germany	probe	Corman-RdRp	Corman-set	RdRp_SARSr-P2	CAGGTGGAACCTCATCAGGAGATGC	15470	15494	25	NC_045512.2	2020-01-23	10.2807/1560-7917.ES.2020.25.3.2000045	Corman et al 2020	-
RdRp	Charité	Germany	probe	Corman-RdRp	Corman-set	RdRp_SARSr-P1	CCAGGTGGWACRTCATCMGGTGATGC	15469	15494	26	NC_045512.2	2020-01-23	10.2807/1560-7917.ES.2020.25.3.2000045	Corman et al 2020	-
ORF1ab	UFRN	Brazil	F	Davi-ORF1a-1	Davi-set	UFRN_1_F	GGGCATACACTCGCTATGTC	804	823	20	NC_045512.2	2021-06-15	10.1038/s41598-021-91817-9	Davi et al 2021	-
ORF1ab	UFRN	Brazil	R	Davi-ORF1a-1	Davi-set	UFRN_1_R	GCATGAAGCTTTACCAGCAC	885	904	20	NC_045512.3	2021-06-15	10.1038/s41598-021-91817-9	Davi et al 2021	-
ORF1ab	UFRN	Brazil	probe	Davi-ORF1a-1	Davi-set	UFRN_1_P	TCTGTGGCCCTGATGGCTACCCT	834	856	23	NC_045512.4	2021-06-15	10.1038/s41598-021-91817-9	Davi et al 2021	-
ORF1ab	UFRN	Brazil	F	Davi-ORF1a-2	Davi-set	UFRN_2_F	GGCTACTAACAATGCCATGC	3496	3515	20	NC_045512.5	2021-06-15	10.1038/s41598-021-91817-9	Davi et al 2021	-
ORF1ab	UFRN	Brazil	R	Davi-ORF1a-2	Davi-set	UFRN_2_R	TAACATTTGGGCCGACAACA	3613	3632	20	NC_045512.6	2021-06-15	10.1038/s41598-021-91817-9	Davi et al 2021	-
ORF1ab	UFRN	Brazil	probe	Davi-ORF1a-2	Davi-set	UFRN_2_P	GGGTGGTAGTTGTGTTTTAAGCGG	3562	3585	24	NC_045512.7	2021-06-15	10.1038/s41598-021-91817-9	Davi et al 2021	-
ORF1ab	UFRN	Brazil	F	Davi-ORF1a-3	Davi-set	UFRN_3_F	TTCATGTTGTCGGCCCAAAT	3609	3628	20	NC_045512.8	2021-06-15	10.1038/s41598-021-91817-9	Davi et al 2021	-
ORF1ab	UFRN	Brazil	R	Davi-ORF1a-3	Davi-set	UFRN_3_R	TGGTGCAAGTAGAACTTCGT	3687	3706	20	NC_045512.9	2021-06-15	10.1038/s41598-021-91817-9	Davi et al 2021	-
ORF1ab	UFRN	Brazil	probe	Davi-ORF1a-3	Davi-set	UFRN_3_P	GAAGACATTCAACTTCTTAAGAGTGC	3641	3666	26	NC_045512.10	2021-06-15	10.1038/s41598-021-91817-9	Davi et al 2021	-
ORF1ab	UFRN	Brazil	F	Davi-ORF1a-4	Davi-set	UFRN_4_F	TGGTGCTAGGAGAGTGTGG	11374	11392	19	NC_045512.11	2021-06-15	10.1038/s41598-021-91817-9	Davi et al 2021	-
ORF1ab	UFRN	Brazil	R	Davi-ORF1a-4	Davi-set	UFRN_4_R	CCCACATGGAAATGGCTTGAT	11448	11468	21	NC_045512.12	2021-06-15	10.1038/s41598-021-91817-9	Davi et al 2021	-
ORF1ab	UFRN	Brazil	probe	Davi-ORF1a-4	Davi-set	UFRN_4_P	CTTATGAATGTCTTGACACTCGTTTATA	11396	11423	28	NC_045512.13	2021-06-15	10.1038/s41598-021-91817-9	Davi et al 2021	-
ORF1ab	UFRN	Brazil	F	Davi-ORF1b-1	Davi-set	UFRN_5_F	AGGGCACACTAGAACCAGAA	17477	17496	20	NC_045512.14	2021-06-15	10.1038/s41598-021-91817-9	Davi et al 2021	-
ORF1ab	UFRN	Brazil	R	Davi-ORF1b-1	Davi-set	UFRN_5_R	CAATTTCAGCAGGACAACGC	17562	17581	20	NC_045512.15	2021-06-15	10.1038/s41598-021-91817-9	Davi et al 2021	-
ORF1ab	UFRN	Brazil	probe	Davi-ORF1b-1	Davi-set	UFRN_5_P	GGTCCAGACATGTTCCTCGGAACT	17533	17556	24	NC_045512.16	2021-06-15	10.1038/s41598-021-91817-9	Davi et al 2021	-
ORF1ab	UFRN	Brazil	F	Davi-ORF1b-2	Davi-set	UFRN_6_F	TCTTCACGACATTGGTAACCC	19023	19043	21	NC_045512.17	2021-06-15	10.1038/s41598-021-91817-9	Davi et al 2021	-
ORF1ab	UFRN	Brazil	R	Davi-ORF1b-2	Davi-set	UFRN_6_R	TCACTACAAGGCTGTGCATC	19093	19112	20	NC_045512.18	2021-06-15	10.1038/s41598-021-91817-9	Davi et al 2021	-
ORF1ab	UFRN	Brazil	probe	Davi-ORF1b-2	Davi-set	UFRN_6_P	TACCTCAAGCTGATGTAGAATGGAAG	19061	19086	26	NC_045512.19	2021-06-15	10.1038/s41598-021-91817-9	Davi et al 2021	-
ORF1ab	UFRN	Brazil	F	Davi-ORF1b-3	Davi-set	UFRN_7_F	CTTCACGACATTGGTAACCCT	19024	19044	21	NC_045512.20	2021-06-15	10.1038/s41598-021-91817-9	Davi et al 2021	-
ORF1ab	UFRN	Brazil	R	Davi-ORF1b-3	Davi-set	UFRN_7_R	GTCACTACAAGGCTGTGCAT	19094	19113	20	NC_045512.21	2021-06-15	10.1038/s41598-021-91817-9	Davi et al 2021	-
ORF1ab	UFRN	Brazil	probe	Davi-ORF1b-3	Davi-set	UFRN_7_P	GTGTACCTCAAGCTGATGTAGAATGG	19058	19083	26	NC_045512.22	2021-06-15	10.1038/s41598-021-91817-9	Davi et al 2021	-
S	UFRN	Brazil	F	Davi-S-1	Davi-set	UFRN_8_F	GGCACAGGTGTTCTTACTGA	23204	23223	20	NC_045512.23	2021-06-15	10.1038/s41598-021-91817-9	Davi et al 2021	-
S	UFRN	Brazil	R	Davi-S-1	Davi-set	UFRN_8_R	TCAAGTGTCTGTGGATCACG	23291	23310	20	NC_045512.24	2021-06-15	10.1038/s41598-021-91817-9	Davi et al 2021	-
S	UFRN	Brazil	probe	Davi-S-1	Davi-set	UFRN_8_P	CCAACAATTTGGCAGAGACATTGC	23248	23271	24	NC_045512.25	2021-06-15	10.1038/s41598-021-91817-9	Davi et al 2021	-
S	UFRN	Brazil	F	Davi-S-2	Davi-set	UFRN_9_F	AGGCACAGGTGTTCTTACTG	23203	23222	20	NC_045512.26	2021-06-15	10.1038/s41598-021-91817-9	Davi et al 2021	-
S	UFRN	Brazil	R	Davi-S-2	Davi-set	UFRN_9_R	TCACGGACAGCATCAGTAGT	23276	23295	20	NC_045512.27	2021-06-15	10.1038/s41598-021-91817-9	Davi et al 2021	-
S	UFRN	Brazil	probe	Davi-S-2	Davi-set	UFRN_9_P	TCCAACAATTTGGCAGAGACATTGC	23247	23271	25	NC_045512.2	2021-06-15	10.1038/s41598-021-91817-9	Davi et al 2021	-
N	DMSC	Thailand	F	DMSC-N	DMSC-set	WH-NIC N-F	CGTTTGGTGGACCCTCAGAT	28320	28339	20	NC_045512.2	2020-01-23	-	DMSC-MPH	https://bit.ly/2ZxOnsw
N	DMSC	Thailand	R	DMSC-N	DMSC-set	WH-NIC N-R	CCCCACTGCGTTCTCCATT	28358	28376	19	NC_045512.2	2020-01-23	-	DMSC-MPH	https://bit.ly/2ZxOnsw
N	DMSC	Thailand	probe	DMSC-N	DMSC-set	WH-NIC N-P	CAACTGGCAGTAACCA	28341	28356	16	NC_045512.2	2020-01-23	-	DMSC-MPH	https://bit.ly/2ZxOnsw
E	Wuhan Jin. Hos.	China	F	Huang-E	Huang-set	Huang-E	ACTTCTTTTTCTTGCTTTCGTGGT	26295	26318	24	NC_045512.2	2020-01-30	10.1016/S0140-6736(20)30183-5	Huang et al. 2020	-
E	Wuhan Jin. Hos.	China	R	Huang-E	Huang-set	Huang-E	GCAGCAGTACGCACACAATC	26357	26376	20	NC_045512.2	2020-01-30	10.1016/S0140-6736(20)30183-5	Huang et al. 2020	-
E	Wuhan Jin. Hos.	China	probe	Huang-E	Huang-set	Huang-E	CTAGTTACACTAGCCATCCTTACTGC	26326	26351	26	NC_045512.2	2020-01-30	10.1016/S0140-6736(20)30183-5	Huang et al. 2020	-
N	CDC-US	USA	F	Lu-N-1	Lu-set	2019-nCoV_N1-F	GACCCCAAAATCAGCGAAAT	28287	28306	20	NC_045512.2	2020-06-06	10.3201/eid2608.201246	Lu et al. 2020	https://bit.ly/2ZBuyk5
N	CDC-US	USA	R	Lu-N-1	Lu-set	2019-nCoV_N1-R	TCTGGTTACTGCCAGTTGAATCTG	28335	28358	24	NC_045512.2	2020-06-06	10.3201/eid2608.201246	Lu et al. 2020	https://bit.ly/2ZBuyk5
N	CDC-US	USA	F	Lu-N-2	Lu-set	2019-nCoV_N2-F	TTACAAACATTGGCCGCAAA	29164	29183	20	NC_045512.2	2020-06-06	10.3201/eid2608.201246	Lu et al. 2020	https://bit.ly/2ZBuyk5
N	CDC-US	USA	R	Lu-N-2	Lu-set	2019-nCoV_N2-R	GCGCGACATTCCGAAGAA	29213	29230	18	NC_045512.2	2020-06-06	10.3201/eid2608.201246	Lu et al. 2020	https://bit.ly/2ZBuyk5
N	CDC-US	USA	F	Lu-N-3	Lu-set	2019-nCoV_N3-F	GGGAGCCTTGAATACACCAAAA	28681	28702	22	NC_045512.2	2020-06-06	10.3201/eid2608.201246	Lu et al. 2020	-
N	CDC-US	USA	R	Lu-N-3	Lu-set	2019-nCoV_N3-R	TGTAGCACGATTGCAGCATTG	28732	28752	21	NC_045512.2	2020-06-06	10.3201/eid2608.201246	Lu et al. 2020	-
N	CDC-US	USA	probe	Lu-N-1	Lu-set	2019-nCoV_N1-probe	ACCCCGCATTACGTTTGGTGGACC	28309	28332	24	NC_045512.2	2020-06-06	10.3201/eid2608.201246	Lu et al. 2020	https://bit.ly/2ZBuyk5
N	CDC-US	USA	probe	Lu-N-2	Lu-set	2019-nCoV_N2-probe	ACAATTTGCCCCCAGCGCTTCAG	29188	29210	23	NC_045512.2	2020-06-06	10.3201/eid2608.201246	Lu et al. 2020	https://bit.ly/2ZBuyk5
N	CDC-US	USA	probe	Lu-N-3	Lu-set	2019-nCoV_N3-probe	AYCACATTGGCACCCGCAATCCTG	28704	28727	24	NC_045512.2	2020-06-06	10.3201/eid2608.201246	Lu et al. 2020	-
E	KMU/IPI	Iran	F	Mollaei-E	Mollaei-set	E	GGAAGAGACAGGTACGTTAA	26262	26281	20	NC_045512.2	2020-06-01	PMID: 32685113	Mollaei et al. 2020	https://bit.ly/39LcTsd
E	KMU/IPI	Iran	R	Mollaei-E	Mollaei-set	E	AAGGTTTTACAAGACTCACG	26388	26407	20	NC_045512.2	2020-06-01	PMID: 32685113	Mollaei et al. 2020	https://bit.ly/39LcTsd
N	KMU/IPI	Iran	F	Mollaei-N	Mollaei-set	N	CCTCTTCTCGTTCCTCATCA	28818	28837	20	NC_045512.2	2020-06-01	PMID: 32685113	Mollaei et al. 2020	https://bit.ly/39LcTsd
N	KMU/IPI	Iran	R	Mollaei-N	Mollaei-set	N	CCTGGTCCCCAAAATTTCCT	29122	29141	20	NC_045512.2	2020-06-01	PMID: 32685113	Mollaei et al. 2020	https://bit.ly/39LcTsd
ORF1ab	KMU/IPI	Iran	F	Mollaei-ORF1ab	Mollaei-set	ORF1ab	CTAGGACCTCTTTCTGCTCA	10802	10821	20	NC_045512.2	2020-06-01	PMID: 32685113	Mollaei et al. 2020	https://bit.ly/39LcTsd
ORF1ab	KMU/IPI	Iran	R	Mollaei-ORF1ab	Mollaei-set	ORF1ab	ACACTCTCCTAGCACCATCA	11371	11390	20	NC_045512.2	2020-06-01	PMID: 32685113	Mollaei et al. 2020	https://bit.ly/39LcTsd
RdRp	KMU/IPI	Iran	F	Mollaei-RdRp	Mollaei-set	RdRp	CATCTCACTTGCTGGTTCCT	4777	4796	20	NC_045512.2	2020-06-01	PMID: 32685113	Mollaei et al. 2020	https://bit.ly/39LcTsd
RdRp	KMU/IPI	Iran	R	Mollaei-RdRp	Mollaei-set	RdRp	CCTTAATAGTCCTCACTTCTCTC	4951	4973	23	NC_045512.2	2020-06-01	PMID: 32685113	Mollaei et al. 2020	https://bit.ly/39LcTsd
S	KMU/IPI	Iran	F	Mollaei-S	Mollaei-set	S	CCCTGTTGCTATTCATGCAG	23422	23441	20	NC_045512.2	2020-06-01	PMID: 32685113	Mollaei et al. 2020	https://bit.ly/39LcTsd
S	KMU/IPI	Iran	R	Mollaei-S	Mollaei-set	S	CCCTATTAAACAGCCTGCAC	23499	23518	20	NC_045512.2	2020-06-01	PMID: 32685113	Mollaei et al. 2020	https://bit.ly/39LcTsd
E	CDC-China	China	F	Niu-E	Niu-set	E	TTCTTGCTTTCGTGGTATTC	26303	26322	20	NC_045512.2	2020-04-17	10.46234/ccdcw2020.116	Niu et al. 2020
E	CDC-China	China	R	Niu-E	Niu-set	E	CACGTTAACAATATTGCAGC	26372	26391	20	NC_045512.2	2020-04-17	10.46234/ccdcw2020.116	Niu et al. 2020
N	CDC-China	China	F	Niu-N	Niu-set	N	GGGGAACTTCTCCTGCTAGAAT	28881	28902	22	NC_045512.2	2020-04-17	10.46234/ccdcw2020.116	Niu et al. 2020	https://bit.ly/2ZxOnsw
N	CDC-China	China	R	Niu-N	Niu-set	N	CAGACATTTTGCTCTCAAGCTG	28958	28979	22	NC_045512.2	2020-04-17	10.46234/ccdcw2020.116	Niu et al. 2020	https://bit.ly/2ZxOnsw
ORF1ab	CDC-China	China	F	Niu-ORF1ab	Niu-set	ORF1ab	CCCTGTGGGTTTTACACTTAA	13342	13362	21	NC_045512.2	2020-04-17	10.46234/ccdcw2020.116	Niu et al. 2020	https://bit.ly/2ZxOnsw
ORF1ab	CDC-China	China	R	Niu-ORF1ab	Niu-set	ORF1ab	ACGATTGTGCATCAGCTGA	13442	13460	19	NC_045512.2	2020-04-17	10.46234/ccdcw2020.116	Niu et al. 2020	https://bit.ly/2ZxOnsw
ORF1ab	CDC-China	China	probe	Niu-ORF1ab	Niu-set	ORF1ab	CCGTCTGCGGTATGTGGAAAGGTTATGG	13377	13404	28	NC_045512.2	2020-04-17	10.46234/ccdcw2020.116	Niu et al. 2020	https://bit.ly/2ZxOnsw
E	CDC-China	China	probe	Niu-E	Niu-set	E	GTTACACTAGCCATCCTTACTGCGCTTCGA	26329	26358	30	NC_045512.2	2020-04-17	10.46234/ccdcw2020.116	Niu et al. 2020	-
N	CDC-China	China	probe	Niu-N	Niu-set	N	TTGCTGCTGCTTGACAGATT	28934	28953	20	NC_045512.2	2020-04-17	10.46234/ccdcw2020.116	Niu et al. 2020	https://bit.ly/2ZxOnsw
RdRp	CDC-China	China	F	Niu-RdRp	Niu-set	RdRp	GGTCATGTGTGGCGGCTC	15438	15455	18	NC_045512.2	2020-04-17	10.46234/ccdcw2020.116	Niu et al. 2020	-
RdRp	CDC-China	China	R	Niu-RdRp	Niu-set	RdRp	GCTGTAACAGCTTGACAAATGAAAG	15525	15545	21	NC_045512.2	2020-04-17	10.46234/ccdcw2020.116	Niu et al. 2020	-
RdRp	CDC-China	China	probe	Niu-RdRp	Niu-set	RdRp	CTATATGTTAAACCAGGTGGAAC	15457	15479	23	NC_045512.2	2020-04-17	10.46234/ccdcw2020.116	Niu et al. 2020	-
RdRp	Institut Pasteur	France	F	IP-RdRp-1	IP-set	nCoV_IP2-12669Fw	ATGAGCTTAGTCCTGTTG	12690	12707	18	NC_045512.2	2020-01-23	-	NRC-IP	https://bit.ly/2ZxOnsw
RdRp	Institut Pasteur	France	R	IP-RdRp-1	IP-set	nCoV_IP2-12759Rv	CTCCCTTTGTTGTGTTGT	12780	12797	18	NC_045512.2	2020-01-23	-	NRC-IP	https://bit.ly/2ZxOnsw
RdRp	Institut Pasteur	France	F	IP-RdRp-2	IP-set	nCoV_IP4-14059Fw	GGTAACTGGTATGATTTCG	14080	14098	19	NC_045512.2	2020-01-23	-	NRC-IP	https://bit.ly/2ZxOnsw
RdRp	Institut Pasteur	France	R	IP-RdRp-2	IP-set	nCoV_IP4-14146Rv	CTGGTCAAGGTTAATATAGG	14167	14186	20	NC_045512.2	2020-01-23	-	NRC-IP	https://bit.ly/2ZxOnsw
RdRp	Institut Pasteur	France	probe	IP-RdRp-1	IP-set	nCoV_IP2-12696bProbe(+)	AGATGTCTTGTGCTGCCGGTA	12717	12737	21	NC_045512.2	2020-01-23	-	NRC-IP	https://bit.ly/2ZxOnsw
RdRp	Institut Pasteur	France	probe	IP-RdRp-2	IP-set	nCoV_IP4-14084Probe(+)	TCATACAAACCACGCCAGG	14105	14123	19	NC_045512.2	2020-01-23	-	NRC-IP	https://bit.ly/2ZxOnsw
N	NIID	Japan	F	Shirato-N	Shirato-set	NIID_2019-nCOV_N_F2	AAATTTTGGGGACCAGGAAC	29125	29144	20	NC_045512.2	2020-07-22	10.7883/yoken.JJID.2020.061	Shirato et al. 2020	https://bit.ly/2ZxOnsw
N	NIID	Japan	R	Shirato-N	Shirato-set	NIID_2019-nCOV_N_R2	TGGCAGCTGTGTAGGTCAAC	29263	29282	20	NC_045512.2	2020-07-22	10.7883/yoken.JJID.2020.061	Shirato et al. 2020	https://bit.ly/2ZxOnsw
N	NIID	Japan	probe	Shirato-N	Shirato-set	NIID_2019-nCOV_N_P2	ATGTCGCGCATTGGCATGGA	29222	29241	20	NC_045512.2	2020-07-22	10.7883/yoken.JJID.2020.061	Shirato et al. 2020	https://bit.ly/2ZxOnsw
E	IBS	South Korea	F	Won-E-1	Won-set	SARS-CoV-2_IBS_E1	TTCGGAAGAGACAGGTACGTT	26259	26279	21	NC_045512.2	2020-04-30	10.5607/en20009	Won J et al. 2020.	-
E	IBS	South Korea	R	Won-E-1	Won-set	SARS-CoV-2_IBS_E1	CACACAATCGATGCGCAGTA	26346	26365	20	NC_045512.2	2020-04-30	10.5607/en20009	Won J et al. 2020.	-
E	IBS	South Korea	F	Won-E-2	Won-set	SARS-CoV-2_IBS_E2	TTCGGAAGAGACAGGTACGTTA	26259	26280	22	NC_045512.2	2020-04-30	10.5607/en20009	Won J et al. 2020.	-
E	IBS	South Korea	R	Won-E-2	Won-set	SARS-CoV-2_IBS_E2	AGCAGTACGCACACAATCG	26356	26374	19	NC_045512.2	2020-04-30	10.5607/en20009	Won J et al. 2020.	-
N	IBS	South Korea	F	Won-N-1	Won-set	SARS-CoV-2_IBS_N1	CAATGCTGCAATCGTGCTAC	28732	28751	20	NC_045512.2	2020-04-30	10.5607/en20009	Won J et al. 2020.	-
N	IBS	South Korea	R	Won-N-1	Won-set	SARS-CoV-2_IBS_N1	GTTGCGACTACGTGATGAGG	28830	28849	20	NC_045512.2	2020-04-30	10.5607/en20009	Won J et al. 2020.	-
N	IBS	South Korea	F	Won-N-2	Won-set	SARS-CoV-2_IBS_N2	GCTGCAATCGTGCTACAACT	28736	28755	20	NC_045512.2	2020-04-30	10.5607/en20009	Won J et al. 2020.	-
N	IBS	South Korea	R	Won-N-2	Won-set	SARS-CoV-2_IBS_N2	TGAACTGTTGCGACTACGTG	28836	28855	20	NC_045512.2	2020-04-30	10.5607/en20009	Won J et al. 2020.	-
RdRp	IBS	South Korea	F	Won-RdRp-1	Won-set	SARS-CoV-2_IBS_RdRp1	CATGTGTGGCGGTTCACTAT	15441	15460	20	NC_045512.2	2020-04-30	10.5607/en20009	Won J et al. 2020.	-
RdRp	IBS	South Korea	R	Won-RdRp-1	Won-set	SARS-CoV-2_IBS_RdRp1	TGCATTAACATTGGCCGTGA	15539	15558	20	NC_045512.2	2020-04-30	10.5607/en20009	Won J et al. 2020.	-
RdRp	IBS	South Korea	F	Won-RdRp-2	Won-set	SARS-CoV-2_IBS_RdRp2	AGAATAGAGCTCGCACCGTA	15092	15111	20	NC_045512.2	2020-04-30	10.5607/en20009	Won J et al. 2020.	-
RdRp	IBS	South Korea	R	Won-RdRp-2	Won-set	SARS-CoV-2_IBS_RdRp2	CTCCTCTAGTGGCGGCTATT	15174	15193	20	NC_045512.2	2020-04-30	10.5607/en20009	Won J et al. 2020.	-
RdRp	IBS	South Korea	F	Won-RdRp-3	Won-set	SARS-CoV-2_IBS_RdRp3	TCTGTGATGCCATGCGAAAT	14015	14034	20	NC_045512.2	2020-04-30	10.5607/en20009	Won J et al. 2020.	-
RdRp	IBS	South Korea	R	Won-RdRp-3	Won-set	SARS-CoV-2_IBS_RdRp3	ACTACCTGGCGTGGTTTGTA	14108	14127	20	NC_045512.2	2020-04-30	10.5607/en20009	Won J et al. 2020.	-
S	IBS	South Korea	F	Won-S-1	Won-set	SARS-CoV-2_IBS_S1	CTACATGCACCAGCAACTGT	23114	23133	20	NC_045512.2	2020-04-30	10.5607/en20009	Won J et al. 2020.	-
S	IBS	South Korea	R	Won-S-1	Won-set	SARS-CoV-2_IBS_S1	CACCTGTGCCTGTTAAACCA	23194	23213	20	NC_045512.2	2020-04-30	10.5607/en20009	Won J et al. 2020.	-
S	IBS	South Korea	F	Won-S-2	Won-set	SARS-CoV-2_IBS_S2	GCTGGTGCTGCAGCTTATTA	22340	22359	20	NC_045512.2	2020-04-30	10.5607/en20009	Won J et al. 2020.	-
S	IBS	South Korea	R	Won-S-2	Won-set	SARS-CoV-2_IBS_S2	AGGGTCAAGTGCACAGTCTA	22428	22447	20	NC_045512.2	2020-04-30	10.5607/en20009	Won J et al. 2020.	-
ORF1ab	HKSAR	Hong Kong	F	Yip-ORF1ab	Yip-set	nsp2f	ATGCATTTGCATCAGAGGCT	1866	1885	20	NC_045512.2	2020-04-08	10.3390/ijms21072574	Yip et al 2020	-
ORF1ab	HKSAR	Hong Kong	R	Yip-ORF1ab	Yip-set	nsp2r	TTGTTATAGCGGCCTTCTGT	1951	1970	20	NC_045512.2	2020-04-08	10.3390/ijms21072574	Yip et al 2020	-
N	NCID	Singapore	F	Young-N	Young-set	Young-N	CTCAGTCCAAGATGGTATTTCT	28583	28604	22	NC_045512.2	2020-03-03	10.1001/jama.2020.3204	Young et al. 2020	-
N	NCID	Singapore	R	Young-N	Young-set	Young-N	AGCACCATAGGGAAGTCC	28631	28648	18	NC_045512.2	2020-03-03	10.1001/jama.2020.3204	Young et al. 2020	-
ORF1ab	NCID	Singapore	F	Young-ORF1ab	Young-set	Young-ORF1ab	TCATTGTTAATGCCTATATTAACC	14155	14178	24	NC_045512.2	2020-03-03	10.1001/jama.2020.3204	Young et al. 2020	-
ORF1ab	NCID	Singapore	R	Young-ORF1ab	Young-set	Young-ORF1ab	CACTTAATGTAAGGCTTTGTTAAG	14220	14243	24	NC_045512.2	2020-03-03	10.1001/jama.2020.3204	Young et al. 2020	-
S	NCID	Singapore	F	Young-S	Young-set	Young-S	TATACATGTCTCTGGGACCA	21763	21782	20	NC_045512.2	2020-03-03	10.1001/jama.2020.3204	Young et al. 2020	-
S	NCID	Singapore	R	Young-S	Young-set	Young-S	ATCCAGCCTCTTATTATGTTAGAC	21853	21876	24	NC_045512.2	2020-03-03	10.1001/jama.2020.3204	Young et al. 2020	-
N	NCID	Singapore	probe	Young-N	Young-set	Young-N	ACCTAGGAACTGGCCCAGAAGCT	28608	28630	23	NC_045512.2	2020-03-03	10.1001/jama.2020.3204	Young et al. 2020	-
ORF1ab	NCID	Singapore	probe	Young-ORF1ab	Young-set	Young-ORF1ab	AACTGCAGAGTCACATGTTGACA	14193	14215	23	NC_045512.2	2020-03-03	10.1001/jama.2020.3204	Young et al. 2020	-
S	NCID	Singapore	probe	Young-S	Young-set	Young-S	CTAAGAGGTTTGATAACCCTGTCCTACC	21789	21816	28	NC_045512.2	2020-03-03	10.1001/jama.2020.3204	Young et al. 2020	-
RdRp	IRMC	Saudi Arabia	F	Tombuloglu-RdRp	Tombuloglu-set	RdRp-F	GTCATGTGTGGCGGTTCACT	15439	15458	20	NC_045512.2	2021-04-29	10.1371/journal.pone.0250942	Tombuloglu et al. 2021	-
RdRp	IRMC	Saudi Arabia	R	Tombuloglu-RdRp	Tombuloglu-set	RdRp-R	CAACACTATTAGCATAAGCAGTTGT	15496	15519	24	NC_045512.2	2021-04-29	10.1371/journal.pone.0250942	Tombuloglu et al. 2021	-
RdRp	IRMC	Saudi Arabia	probe	Tombuloglu-RdRp	Tombuloglu-set	RdRp- P	CAGGTGGAACCTCATCAGGAGATGC	15470	15494	25	NC_045512.2	2021-04-29	10.1371/journal.pone.0250942	Tombuloglu et al. 2021	-
E	IRMC	Saudi Arabia	F	Tombuloglu-E	Tombuloglu-set	E-F	GGAAGAGACAGGTACGTTAATA	26262	26283	22	NC_045512.2	2021-04-29	10.1371/journal.pone.0250942	Tombuloglu et al. 2021	-
E	IRMC	Saudi Arabia	R	Tombuloglu-E	Tombuloglu-set	E-R	AGCAGTACGCACACAATCGAA	26354	26374	21	NC_045512.2	2021-04-29	10.1371/journal.pone.0250942	Tombuloglu et al. 2021	-
E	IRMC	Saudi Arabia	probe	Tombuloglu-E	Tombuloglu-set	E-P	ACACTAGCCATCCTTACTGCGCTTCG	26332	26357	26	NC_045512.2	2021-04-29	10.1371/journal.pone.0250942	Tombuloglu et al. 2021	-
E	JUST	Bangladesh	F	Sarkar-E	Sarkar-set	JUST_E1_F	ATTCGTTTCGGAAGAGACAGG	26254	26274	21	NC_045512.2	2022-04-20	10.1038/s41598-022-10413-7	Sarkar et al. 2022	-
E	JUST	Bangladesh	R	Sarkar-E	Sarkar-set	JUST_E1_R	CGCACACAATCGAAGCGC	26350	26367	18	NC_045512.2	2022-04-20	10.1038/s41598-022-10413-7	Sarkar et al. 2022	-
N	JUST	Bangladesh	F	Sarkar-N	Sarkar-set	JUST_N1_F	ACCCAATAATACTGCGTCTTGG	28409	28430	22	NC_045512.2	2022-04-20	10.1038/s41598-022-10413-7	Sarkar et al. 2022	-
N	JUST	Bangladesh	R	Sarkar-N	Sarkar-set	JUST_N1_R	GGTAGCTCTTCGGTAGTAGCC	28527	28547	21	NC_045512.2	2022-04-20	10.1038/s41598-022-10413-7	Sarkar et al. 2022	-
RdRp	JUST	Bangladesh	F	Sarkar-RdRp	Sarkar-set	JUST_RdRp1_F	GTACTGATGTCGTATACAGGGC	13255	13276	22	NC_045512.2	2022-04-20	10.1038/s41598-022-10413-7	Sarkar et al. 2022	-
RdRp	JUST	Bangladesh	R	Sarkar-RdRp	Sarkar-set	JUST_RdRp1_R	CTTCGTCCTTTTCTTGGAAGCG	13338	13359	22	NC_045512.2	2022-04-20	10.1038/s41598-022-10413-7	Sarkar et al. 2022	-
S	JUST	Bangladesh	F	Sarkar-S	Sarkar-set	JUST_S1_F	ACAACCAGAACTCAATTACCCC	21617	21638	22	NC_045512.2	2022-04-20	10.1038/s41598-022-10413-7	Sarkar et al. 2022	-
S	JUST	Bangladesh	R	Sarkar-S	Sarkar-set	JUST_S1_R	TGTCAGGGTAATAAACACCACG	21663	21684	22	NC_045512.2	2022-04-20	10.1038/s41598-022-10413-7	Sarkar et al. 2022	-
